# Supplementary material
Source: Springer Nature journal article supplement (https://www.springermedizin.de/resource/supplementary/12913_2014_3525_MOESM1_ESM.pdf/9533044)
Supplement: MOESM1 [file 9533044]

**Appendix 1: Key informant interview guide based on the WHY/HOW/WHAT dimensions of the Pettigrew and Whipp framework for strategic change and existing implementation literature (variation in questions asked depended on participants role).**

1. **WHY:** What was/were (the) specific motivation(s) for change: why did hospitals wish to implement a cardiac risk score?
  - a. At the department level.

*“What was the main incentive to start or continue cardiac risk score implementation in your department?”*
  - b. In terms of the external context.

*“Has the implementation been guided by factors at the national or organizational level?”*
2. **HOW:** What implementation efforts were undertaken to facilitate implementation or to sustain implementation regarding cardiac risk scores?
  - a. Effective implementation strategies.

*“Which interventions were applied to implement a cardiac risk score?”*

*“Which of these interventions enhanced the implementation process?”*
  - b. Perceived implementation-related facilitators and barriers.

*“What facilitated implementation activities in your department?”*

*“What hindered implementation activities in your department?”*

*“What could have been done differently?”*
  - c. Resource utilization and management support

*“Did you receive management support at the organizational level, if so in what way?”*

*“Where necessary resources available for successful implementation?”*

*“Did intended users receive proper training regarding the use and purpose of cardiac risk score instruments?”*
  - d. Sustain change.

*“What activities have been taken place to ensure cardiac risk score use over time?”*

*“Has the use of cardiac risk scores become part of the risk stratification process at your department?”*
3. **WHAT:** What were the perceptions of health care providers regarding cardiac risk scores and what unintended and intended benefits or risks did they experience?
  - a. In terms of prior expectations

*“What were expectations prior to implementation and in what extent did they come true?”*

*“What is, if so, the additional value of a cardiac risk score to the usual risk stratification process that already existed in your department?”*

b. In terms of additional value for clinical practice

*“What were the effects of introducing cardiac risk scores for your department?”*

*“What benefits do cardiac risk scores possible bring or brought for your department?”*

*“What disadvantages do cardiac risk scores possible bring or brought for your department?”*

*“Has the implementation of a cardiac risk score affected culture or habits in your department? If so, describe the shift?”*

c. In terms of application in practice

*“What was/were motivation(s) to choose a specific type of cardiac risk score?”*

*“How is the score applied in practice (type of risk score, target group, intended users, location)?”*

*“How do you perceive the user-friendliness of the instrument?”*

*“Can you describe current practices regarding cardiac risk score use?”*

**Source: Pettigrew AM, Whipp R. Managing Change for Competitive Success. Oxford: Blackwell Publishing; 1993.**
